# Supplementary material for: Genome-Wide Identification and Comprehensive Characterization of the Aux/IAA Gene Family in Cucurbita moschata and Its Response Analysis to Abiotic Stress
Source: Research Square preprint supplement (doi:10.21203/rs.3.rs-8529495/v1), 2026-01-28
Supplement: Supplementary file 1 [file 5cc7bc89b0c899c45f4e3039.xlsx]

## Sheet: Sheet1
Additional file 1 List of primers for qRT-PCR in this study
Primer name	left primer	right primer
CmIAA1	TTCCGAGCCTTACTTGCTGG	GCTTCTTCAACACGCCACTG
CmIAA2	GATCGGGATGGCGATTGGAT	AGGCAACCATCTGACCTTCG
CmIAA3	TGGAAGACAAGAGTGACGGC	GCCTCTCCTTCAACCCTCAC
CmIAA4	AATCCAAGCCCAACTCCTCG	CAAGCGTTGTGTTGAGCGAA
CmIAA5	ACCAATCCAATCGCTTCGGT	TCTAGAACCAAGCGGGCAAG
CmIAA6	CCACCAACTCAAGAGCTCGT	CCTCACTCCAACGAGCAACT
CmIAA7	TGGAGCTGATGGAGATGGGA	AGGGAAACAGTCTTCGGCAG
CmIAA8	AGATCCGCTGGCAGATCATG	TTTGACAGGTTCTGGAGGGC
CmIAA9	CTGCGTCGATCTCCTCTCAC	GACCTGGTTACTTCTCCCGC
CmIAA10	ACATTTTCAAACTGGCCGCC	CCATTCCACTCCACAGGCTT
CmIAA11	GCACCATAATCGGCGTTGAC	AGCCACAAACGGTTCGATCT
CmIAA12	GGAAAGGGGAGAATGGGAGC	ATGCTCATCCTCCTCCCCAT
CmIAA13	GCACTCATGGTGGCTTCTCT	GACGCTCCACCCAGTTGTTA
CmIAA14	GCTTTAATGGCGTCGTCGTC	CTCACCTGCAAAACCGCTTC
CmIAA15	ACAACCACGAAGGCATTTGC	TTGCAAGCACACCAAGATGC
CmIAA16	TCATCGCCATGTTCACCACA	TCGAACCAGAACCTTGAGGC
CmIAA17	CTAAGGCACAGGTTGTCGGT	AGAGTGCACCAGGTATTGCC
CmIAA18	GGCGTAATCTACAGGTCGGG	CGGAGGAGTCATCATCTGGC
CmIAA19	CACCGAGCTCCGATTAGGTC	GGGGGATTTTCTTGGTCGGA
CmIAA20	CGGAAGGTGGACTTGAAGCT	TCATTCCTTCCGACTCGCAC
CmIAA21	GCAGGTGCAGCAGTTGTTAC	GTTGTGGCTGTTGCATCTGG
CmIAA22	GTGAAGAGACTGTCGCCCAA	TCCTCCGTATGGTTGGCAAC
CmIAA23	GGAGGGCGGAGGGATTTATG	GGGGCATAATCCGATCCCTG
CmIAA24	GAGCTCTGTCTCGGCTTACC	TAGGCTCTTCTGACCGTCGA
CmIAA25	TGCTGGAGAAAAGGGTAGCG	GCGTTCGAGAGCTCTTGGTA
CmIAA26	CGTTTGAAGCTGGCCTCAAC	CGGAGGAGCTTTGGTTGGAT
CmIAA27	ATGCTTCCATGGTGGGTCTG	AGTCTGAGGAGGCTGAGGAG
CmIAA28	CAAGGCCTTCTGGACCTCAG	TGAAGCTGGGGCGTTATTGT
CmIAA29	CGGCGGAGTTTTGCAAAGAA	CCCTGCACAAGCCTTCCATA
CmIAA30	AGCGATTGGATGCTCGTAGG	CCCTTTGGCTTCCGATCCTT
CmIAA31	GGTCTACCGGGAAATAGCGG	GCTGGGATCGACAACTACGT
CmIAA32	TTTGCTTGCTTTGGAACGGG	TAAATTGCAGGCCGAACCCT
CmIAA33	CATTCAGAGCAACGATGGCG	ACGCTCGTCGGAATGTTCTT
CmIAA34	GAACGACTCTGCTCCTCCAC	CATAAATCCCTCCGCCCTCC
CmIAA35	CAATCCCAGGGCATGTCCTT	CATCCCGAACCTCATACCCG
CmIAA36	GCTTCAACTTGAGCTAGCGC	ACAGACAGCTCCTCGGATCT
CmIAA37	GGGACAGGGAATGGGAGTTG	TGCAAGCCTGTCTTCTCCAG
CmIAA38	TTCACGGAGCCACCTTACAC	TTCCCGGGAGATGCAGTTTC
CmIAA39	CTCTGTTCCCCACCAATCCC	CGATATCGAGAGGGCGCTTT
CmIAA40	GAGCTCACCTTGGGACTTCC	CTCGGTTCACTTGTCGAGCT
CmIAA41	AAGAGGGGCTTCTCTGTTGC	GGCCGACGGAGAAATACCAT
CmIAA42	CCCTTCTCCTTCACGACACC	AGCAGAGGAAGTGTTCGACG
CmIAA43	GAGACAGTTCCAGAGTCGCC	TTTCCTTGTGGAGTTCCCGG
CmIAA44	TCTACGTTGCCAAAGCCACT	AAGAACGAATGGGTGGCCAT
CmIAA45	CCCTAAAACGACGGACACGA	CGCCTTTCTCGGTTTCCTCT
CmIAA46	CTGACTGGATGCTCGTTGGT	TTCCTGTTCCGGCACTTCTC
CmIAA47	TCTCACACACAATCCCCAGC	CTCCTCCTCCTCCATCTGCT
CmIAA48	GCTGACAACTGGATGGAGCT	TTGTCGGTTGCCTATTCGCT
CmIAA49	AACCTCGCCGGACAATCAAT	TTCTGAACGATCTGACCGGC
CmIAA50	ACAACCAGGGATGCCAGATG	GCAACCATGGACGGCAAAAT
CmIAA51	GCACACATGGCGGTTTTTCT	CTGCATGGAGAAGTCCTGCA
CmIAA52	TGACGAGAAACCGATCACCG	TTCCTTCACTTAGGGCGCAG
CmIAA53	GCTCAGATTAGGGCTTCCGG	CTCTTCGAGCATCTCCGGTC
CmIAA54	CCGACGACGACAACAACAAC	ACAATCTGAGCCTTGGTGGG
CmIAA55	TTGGATGCTCGTGGGAGATG	ACCACCTCTTCAGCTTCTGC
CmIAA56	AGGTGGATAAGCACCAACCG	AAATCCCACTTCCGAGGCTG
CmIAA57	AGCCAAGGGTATCGTTGTGG	AGGAGACTCCAGGATGCCAT
CmIAA58	CCAGATCCGGAAGCGAGTAC	CTTTGCCGGTGGAGGATGAT
CmIAA59	CGTCTTCAGCAGTCACAGGT	TCCCAAAGTGCTGGCTTAGG
CmIAA60	TGGCTGCTGATCAACCGATT	TGAACCTTGGTCCGACTTCG
CmIAA61	AGAGAGGGGGATTGGATGCT	TGCTAGTCCGTTGGCTTCAG
CmIAA62	GTGGCAAGAATGTTGCAGCA	CACTGTTCCCTTTCTCCGCT
CmIAA63	ATCCAAGCCTGCGTTTCAGA	GTTCTCCAGGGTGTCGTCTG
CmIAA64	TTGGCTAAGGCACAGGTTGT	TACAGGCAACCGGTCAACTC
CmIAA65	TTGTTGGAGACGTCCCATGG	TAAATTGCAGGCCGAACCCT
CmIAA66	GAGATCTCCAAGCCACCGAG	TGGAGGGAGGAGATTGGGAG
CmIAA67	GTCTGCCCGGAAACAACAAC	ATCGTTTCTCGGGTTGCGAT
CmIAA68	CTACCTCGAGCTACGCAGTG	TGCCAGCCTGATCTCAAAGG
CmIAA69	TTCTAGCCTTGCCCTTCAGC	ATGGAACGTCACCGACACTC
CmIAA70	GGCTAGGGTTGCCTGGAAAT	CTACCACTTGTGCCTTGGGT
CmIAA71	TGATGTTGTCGTCTGAGGGC	TCCCAAATTGAGCGACGGAA
CmIAA72	AAATTGCCTCTGCCTCTCCC	ATTCCTCCAGCTCTTTGCCC
