# Supplementary material for: Genome-Wide Identification and Comprehensive Characterization of the Aux/IAA Gene Family in Cucurbita moschata and Its Response Analysis to Abiotic Stress
Source: Research Square preprint supplement (doi:10.21203/rs.3.rs-8529495/v1), 2026-01-28
Supplement: Supplementary file 2 [file 6d382588fe34828097fe0666.xlsx]

## Sheet: Sheet1
Additional file 4 Expression profiles of C.moschata Aux/IAA genes in response to drought and salt stress																																											leaf					root
Gene_ID	Gene_ID	leaf			root
		CK	NaCI	PEG	CK	NaCI	PEG
CmIAA1	CmoCh01G000950	4.22±0.05	5.14±0.04	5.04±0.03	5.83±0.02	6.63±0.03	5.74±0.03
CmIAA2	CmoCh01G001250	1.53±0.1	0.67±0.13	0.57±0.33	0.66±0.1	1.58±0.2	2.23±0.27
CmIAA3	CmoCh01G001260	1.45±0.21	0.74±0.18	0.62±0.14	0.26±0.13	0.64±0.34	1.07±0.13
CmIAA4	CmoCh01G014970	1.34±0.18	1.51±0.08	1.2±0.15	2.8±0.04	1.71±0.05	2.34±0.03
CmIAA5	CmoCh01G015610	5±0.03	4.95±0.03	4.82±0.04	4.54±0.02	4.29±0.07	4.22±0.04
CmIAA6	CmoCh01G020170	3.65±0.01	3.71±0.05	3.39±0.13	2.6±0.07	3.88±0.08	2.28±0.1
CmIAA7	CmoCh02G008800	3.51±0.06	2.78±0.06	2.56±0.1	3.5±0.05	3.05±0.09	2.09±0.06
CmIAA8	CmoCh02G009300	4.41±0.12	4.65±0.04	4.41±0.05	4.54±0.14	5.13±0.04	3.16±0.16
CmIAA9	CmoCh02G017600	4.54±0.06	4.24±0.06	4.4±0.07	4.36±0.1	4.59±0.07	3.96±0.06
CmIAA10	CmoCh02G018170	4.58±0.02	4.77±0.01	4.29±0.04	2.45±0.08	2.65±0.03	1.99±0.14
CmIAA11	CmoCh04G007210	3.57±0.06	4.39±0.04	4.06±0.07	4.69±0.07	5±0.03	4.35±0.05
CmIAA12	CmoCh04G015610	0.34±0.17	0.37±0.17	0.05±0.09	0±0	0.8±0.39	0±0
CmIAA13	CmoCh04G020040	5.34±0.08	5.7±0.03	5.72±0.03	5.9±0.02	6.52±0.02	5.41±0.03
CmIAA14	CmoCh04G023590	3.84±0.04	3.55±0.04	3.28±0.06	2.98±0.07	3.32±0.03	2.26±0.11
CmIAA15	CmoCh04G028890	4.34±0.02	4.61±0.06	4.6±0.05	2.82±0.24	3.42±0.08	2.66±0.06
CmIAA16	CmoCh05G003790	3.31±0.11	3.7±0.1	3.95±0.07	3.18±0.16	2.84±0.14	2.6±0.08
CmIAA17	CmoCh05G005900	4.95±0.11	5.02±0.05	4.91±0.06	4.91±0.06	5.13±0.12	5.14±0.04
CmIAA18	CmoCh05G007670	3.53±0.09	2.85±0.07	2.73±0.06	4.69±0.03	4.95±0.02	3.77±0.06
CmIAA19	CmoCh05G012250	2.4±0.09	1.08±0.14	1.15±0.34	3.57±0.16	3.19±0.08	4.86±0.02
CmIAA20	CmoCh05G012260	4.12±0.15	5±0.05	4.8±0.09	5.03±0.06	5.2±0.06	6.86±0.06
CmIAA21	CmoCh05G014250	3.96±0.08	3.82±0.05	3.7±0.05	3.46±0.06	3.64±0.03	2.44±0.08
CmIAA22	CmoCh06G000030	5.59±0.03	5.53±0.06	5.52±0.02	4.98±0.1	5.33±0.04	4.38±0.09
CmIAA23	CmoCh06G009480	5.38±0.01	5.37±0.01	5.56±0.04	5.62±0.07	7.93±0.02	7.63±0.04
CmIAA24	CmoCh06G009490	6.67±0.03	6.37±0.06	6.37±0.04	3.66±0.11	3.79±0.08	4.84±0.03
CmIAA25	CmoCh06G013550	5.03±0.06	3.39±0.12	3.42±0.05	5.45±0.02	5.85±0.03	5.33±0.03
CmIAA26	CmoCh06G013570	5.14±0.06	4.99±0.05	5.39±0.08	3.5±0.19	5.93±0.01	4.28±0.07
CmIAA27	CmoCh07G000800	3.19±0.06	3.64±0.07	3.47±0.1	3.52±0.06	3.65±0.07	2.76±0.08
CmIAA28	CmoCh07G006010	2.53±0.01	2.04±0.13	1.85±0.06	4.93±0.03	3.97±0.11	4.48±0.11
CmIAA29	CmoCh08G001220	2.97±0.01	3.3±0.09	2.82±0.09	0.41±0.06	1.58±0.16	0.5±0.13
CmIAA30	CmoCh08G003010	4.73±0.06	4.02±0.07	4.68±0.04	0.6±0.24	3.33±0.1	1.37±0.11
CmIAA31	CmoCh08G003030	5.85±0.04	4.94±0.07	5.08±0.03	2.43±0.13	1.95±0.13	3.76±0.09
CmIAA32	CmoCh08G006140	3.53±0.2	2.57±0.16	2.58±0.18	1.95±0.21	2.36±0.26	1.39±0.28
CmIAA33	CmoCh08G010880	5.72±0.08	6.26±0.07	6.47±0.05	3.21±0.16	3.33±0.22	5.16±0.07
CmIAA34	CmoCh08G010900	5.63±0.02	5.55±0.09	5.78±0.08	4.2±0.18	5.03±0.05	4.64±0.1
CmIAA35	CmoCh09G001150	1.44±0.18	1.65±0.03	1.04±0.13	2.89±0.03	3.11±0.08	1.92±0.18
CmIAA36	CmoCh09G004620	2.13±0.13	2.43±0.06	2.27±0.16	1.75±0.16	2.44±0.17	2.08±0.12
CmIAA37	CmoCh09G006100	1.42±0.28	1.89±0.12	1.48±0.22	2.71±0.06	2.43±0.06	2.76±0.03
CmIAA38	CmoCh10G000150	6.47±0.03	6.87±0.03	6.82±0.03	5.57±0.04	5.36±0.02	5.1±0.04
CmIAA39	CmoCh10G005700	2.74±0.16	3.88±0.08	4.19±0.12	4.39±0.18	8.33±0.03	7.69±0.02
CmIAA40	CmoCh10G006330	1.76±0.26	2.08±0.15	2.54±0.03	5.94±0.08	6.3±0.01	8.13±0.02
CmIAA41	CmoCh10G006720	4.99±0.06	4.71±0.04	4.54±0.05	5.5±0.04	5.55±0.05	4.84±0.05
CmIAA42	CmoCh11G005280	3.18±0.06	3.43±0.11	3.25±0.03	1.37±0.18	6.5±0.03	2.57±0.15
CmIAA43	CmoCh11G005910	1.64±0.14	1.37±0.35	2.14±0.15	3.04±0.04	5.78±0.02	4.78±0.05
CmIAA44	CmoCh11G006340	4.44±0.13	4.51±0.09	3.9±0.04	5.34±0.06	4.51±0.03	4.29±0.06
CmIAA45	CmoCh11G009990	6.53±0.07	6.1±0.07	6.08±0.07	2.55±0.26	2.33±0.12	2.57±0.28
CmIAA46	CmoCh12G001340	6.91±0.02	6.34±0.03	6.55±0	7.2±0.01	6.79±0.01	6.83±0.04
CmIAA47	CmoCh12G008890	1.59±0.4	2.07±0.19	1.27±0.13	2.27±0.45	2.82±0.22	3.06±0.08
CmIAA48	CmoCh12G009300	4.22±0.01	4.64±0.07	4.63±0.03	4.88±0.02	5.03±0.07	4.1±0.01
CmIAA49	CmoCh12G011430	2.93±0.22	3.09±0.06	2.83±0.09	5±0.05	3.64±0.08	5.3±0.04
CmIAA50	CmoCh12G013660	3.9±0.05	4.08±0.06	3.81±0.06	3.54±0.01	3.38±0.14	3.03±0.07
CmIAA51	CmoCh13G005400	3.92±0.05	3.65±0.07	3.16±0.04	3.03±0.05	3.58±0.05	1.98±0.05
CmIAA52	CmoCh14G013230	3.51±0.04	3.55±0.03	3.08±0.08	6.11±0.04	5.23±0.03	5.42±0.08
CmIAA53	CmoCh14G013540	0.75±0.58	0.95±0.13	0.59±0.22	0.7±0.32	2.87±0.13	2.94±0.17
CmIAA54	CmoCh14G018090	4.54±0.08	4.31±0.06	4.62±0.02	5.11±0.04	5.99±0.03	5.97±0.03
CmIAA55	CmoCh14G018110	5.01±0.09	4.85±0.09	5.07±0.09	6.15±0.05	6.54±0.05	6.78±0.01
CmIAA56	CmoCh14G018910	3.26±0.15	3.15±0.05	2.92±0.19	4.09±0.07	5.26±0	4.15±0.07
CmIAA57	CmoCh15G008070	2.86±0.07	2.68±0.1	2.52±0.02	3.03±0.05	3.64±0.05	2.74±0.11
CmIAA58	CmoCh15G011500	2.67±0.18	1.92±0.1	2.64±0.04	0.16±0.15	1.27±0.43	0.4±0.21
CmIAA59	CmoCh15G013610	4.22±0.03	4.81±0.04	4.56±0.07	4.62±0.01	4.52±0.04	3.81±0.09
CmIAA60	CmoCh16G005850	3.85±0.05	4.45±0.07	4.27±0.04	6.13±0.03	6.15±0.02	5.98±0.04
CmIAA61	CmoCh17G001350	0.93±0.16	1.33±0.11	0.94±0.17	2.45±0.09	5.7±0.02	3.04±0.12
CmIAA62	CmoCh17G001860	4.96±0.03	3.54±0.17	3.7±0.03	3.57±0.15	4.06±0.17	5.13±0.05
CmIAA63	CmoCh17G001880	5.38±0.08	4.71±0.03	4.72±0.08	5.96±0.1	6.33±0.03	6.5±0.04
CmIAA64	CmoCh17G007560	3.71±0.05	3.62±0.03	3.1±0.07	3.64±0.1	3.52±0.09	2.64±0.27
CmIAA65	CmoCh17G007960	2.67±0.11	1.67±0.14	1.73±0.17	2.53±0.19	3.42±0.07	3.85±0.1
CmIAA66	CmoCh17G011930	5.37±0.05	5.27±0.06	5.55±0.08	0.82±0.38	2.36±0.16	2.17±0.26
CmIAA67	CmoCh17G011940	5.66±0.05	5.12±0.07	5.17±0.01	3.26±0.04	2.54±0.22	4.11±0.07
CmIAA68	CmoCh18G004680	3.9±0.11	3.4±0.07	2.97±0.05	2.72±0.08	2.29±0.14	1.62±0.1
CmIAA69	CmoCh18G010050	0.03±0.05	0.17±0.02	0±0	0±0	0.77±0.22	0±0
CmIAA70	CmoCh19G000550	5.29±0.15	5.65±0.09	5.82±0.05	0.09±0.09	0.43±0.2	0.03±0.05
CmIAA71	CmoCh19G001290	4.65±0.09	4.3±0.07	4.62±0.07	4.37±0.06	6.03±0.02	4.71±0.06
CmIAA72	CmoCh20G005090	2.87±0.07	2.86±0.04	2.58±0.03	2.67±0.1	2.63±0.09	1.86±0.1
