# Supplementary material for: Genome-Wide Identification and Comprehensive Characterization of the Aux/IAA Gene Family in Cucurbita moschata and Its Response Analysis to Abiotic Stress
Source: Research Square preprint supplement (doi:10.21203/rs.3.rs-8529495/v1), 2026-01-28
Supplement: Supplementary file 3 [file 6fc4d2767cb2e1690406bf8c.xlsx]

## Sheet: Sheet1
Table1：Informantion of AUX/IAA genes identified in C.moschata
Genome Name	Gene ID	Chromosome location	Amino Acids Number（aa)	Isoelecttic point (pI)	Molecular weight(Da)
CmIAA1	CmoCh01G000950.1	Chr01	315	8.56	34523.8
CmIAA2	CmoCh01G001250.1	Chr01	196	7.6	21943.9
CmIAA3	CmoCh01G001260.1	Chr01	158	8.86	17788.5
CmIAA4	CmoCh01G014970.1	Chr01	989	6.83	111112
CmIAA5	CmoCh01G015610.1	Chr01	1160	6.46	129445
CmIAA6	CmoCh01G020170.1	Chr01	967	5.3	106455
CmIAA7	CmoCh02G008800.1	Chr02	795	6.44	87897.8
CmIAA8	CmoCh02G009300.1	Chr02	734	5.84	82159.7
CmIAA9	CmoCh02G017600.1	Chr02	279	6.98	30257.8
CmIAA10	CmoCh02G018170.1	Chr02	1275	6.62	141556
CmIAA11	CmoCh04G007210.1	Chr04	709	6.68	79522.4
CmIAA12	CmoCh04G015610.1	Chr04	199	4.57	22700.1
CmIAA13	CmoCh04G020040.1	Chr04	754	6.67	83790.7
CmIAA14	CmoCh04G023590.1	Chr04	1151	6.24	128436
CmIAA15	CmoCh04G028890.1	Chr04	856	6.08	94971
CmIAA16	CmoCh05G003790.1	Chr05	190	5.81	21935.8
CmIAA17	CmoCh05G005900.1	Chr05	363	6.57	39872.9
CmIAA18	CmoCh05G007670.1	Chr05	1114	6.71	122841
CmIAA19	CmoCh05G012250.1	Chr05	219	9.81	24420.3
CmIAA20	CmoCh05G012260.1	Chr05	238	5.34	26073.3
CmIAA21	CmoCh05G014250.1	Chr05	1120	5.99	124418
CmIAA22	CmoCh06G000030.1	Chr06	445	5.74	49299.7
CmIAA23	CmoCh06G009480.1	Chr06	180	8.91	19972.8
CmIAA24	CmoCh06G009490.1	Chr06	242	7.51	26404.2
CmIAA25	CmoCh06G013550.1	Chr06	232	6.41	25180.8
CmIAA26	CmoCh06G013570.1	Chr06	198	5.2	21708.5
CmIAA27	CmoCh07G000800.1	Chr07	992	6.46	110844
CmIAA28	CmoCh07G006010.1	Chr07	371	6.11	40607.7
CmIAA29	CmoCh08G001220.1	Chr08	748	6.2	83770.4
CmIAA30	CmoCh08G003010.1	Chr08	201	5.35	22316.2
CmIAA31	CmoCh08G003030.1	Chr08	284	8.53	31195.5
CmIAA32	CmoCh08G006140.1	Chr08	182	9.11	20576.7
CmIAA33	CmoCh08G010880.1	Chr08	252	8.93	27492.6
CmIAA34	CmoCh08G010900.1	Chr08	179	8.78	19631.3
CmIAA35	CmoCh09G001150.1	Chr09	912	5.27	100534
CmIAA36	CmoCh09G004620.1	Chr09	237	5.3	27200.5
CmIAA37	CmoCh09G006100.1	Chr09	352	7.13	39097.3
CmIAA38	CmoCh10G000150.1	Chr10	849	5.74	93598.2
CmIAA39	CmoCh10G005700.1	Chr10	217	8.51	24928.2
CmIAA40	CmoCh10G006330.1	Chr10	198	5.01	22276.2
CmIAA41	CmoCh10G006720.1	Chr10	306	5.93	32976.9
CmIAA42	CmoCh11G005280.1	Chr11	207	5.98	23780.8
CmIAA43	CmoCh11G005910.1	Chr11	202	7.72	22948
CmIAA44	CmoCh11G006340.1	Chr11	317	5.62	34228.7
CmIAA45	CmoCh11G009990.1	Chr11	225	8.85	24684.2
CmIAA46	CmoCh12G001340.1	Chr12	355	5.69	39109.8
CmIAA47	CmoCh12G008890.1	Chr12	167	4.94	18641.8
CmIAA48	CmoCh12G009300.1	Chr12	1115	6.3	123145
CmIAA49	CmoCh12G011430.1	Chr12	195	5.41	21603.6
CmIAA50	CmoCh12G013660.1	Chr12	1178	6.15	131480
CmIAA51	CmoCh13G005400.1	Chr13	1000	5.76	111348
CmIAA52	CmoCh14G013230.1	Chr14	313	8.08	34006.4
CmIAA53	CmoCh14G013540.1	Chr14	173	9.14	19626.2
CmIAA54	CmoCh14G018090.1	Chr14	204	5.64	22628.4
CmIAA55	CmoCh14G018110.1	Chr14	241	6.41	26181.9
CmIAA56	CmoCh14G018910.1	Chr14	313	7.79	33071.3
CmIAA57	CmoCh15G008070.1	Chr15	853	5.83	95201
CmIAA58	CmoCh15G011500.1	Chr15	241	6.6	27733.8
CmIAA59	CmoCh15G013610.1	Chr15	695	6.05	77187.4
CmIAA60	CmoCh16G005850.1	Chr16	694	7.09	77641.6
CmIAA61	CmoCh17G001350.1	Chr17	296	7.55	31659.7
CmIAA62	CmoCh17G001860.1	Chr17	250	7.52	26877.7
CmIAA63	CmoCh17G001880.1	Chr17	195	5.67	21693.7
CmIAA64	CmoCh17G007560.1	Chr17	343	8.46	37199
CmIAA65	CmoCh17G007960.1	Chr17	183	5.57	20683.4
CmIAA66	CmoCh17G011930.1	Chr17	195	8.68	21874.7
CmIAA67	CmoCh17G011940.1	Chr17	234	7.59	25779.3
CmIAA68	CmoCh18G004680.1	Chr18	903	6.01	99859.3
CmIAA69	CmoCh18G010050.1	Chr18	182	5.83	21052.9
CmIAA70	CmoCh19G000550.1	Chr19	202	9.62	23005.5
CmIAA71	CmoCh19G001290.1	Chr19	281	7.71	30112.7
CmIAA72	CmoCh20G005090.1	Chr20	779	6.38	86292.7

## Sheet: Sheet2
MEMNGCSEKDEDCPQLLDLIPKHRQWLSAVDVAGKTQTSDDKKLELRLGLPGEADWSRNERNDSVLSFGHFPTSSKFSPSENPWSSSANFLGKLQPNNFSGFCSKMGDLQNAEAKSFPSSANTPVSNTSQKRTAPAPVVGWPPIRSSRRNLRSSSFEKPAVESADAAPSKLPAPREKRVEAGGKGLFVKINMDGVPIGRKIDLNAYDNYQRLSSAVDELFRALLAGNLHKNCSEAQRDSSGSGVLKKQEEEKPITGLLDGSGEYTLVYEDNEGDRVLVGDVPWQMFISTVKRLRVLKSSELPALSVVGSRPQKRS	8.56	34523.8
MASNGLELEITELRLGLPGSGHTSSSKHDNKRVFSEMNGNEGGDERSSNDCDGGDRRCSKKTQVVGWPPVCSYRRRSNGNDKDLSETLKMYVKVSMDGAPYLRKVDLGMHKGYSDLGMAMENLFGCAIGSSDYVPIYEDRDGDWMLVGDVPWKMFVESCKRLRIMKRSEAKGFEIQVPKTRRSDGCLTKIVEMHTS	7.6	21943.9
MATEGLGLEITELRLGPIPASKNNEKKRVFSEVEVEDKSDGGGRKQVVGWPPVCSYRRRNSLREKEESEGVMGGRKKMYVKVRVEGEAFVRKVDLGMVKGYGELVDAVEKLFGTPIGCSHCTITYEDRDGDWMLVGDVPWKMFIESCKRLRIIKKSSS	8.86	17788.5
MGRCPELLDLISMNREWKLTRNGGESSVSENNKTELRLGLPGGEGEESSNSSSSLNINHESGEFLVPSAKLFPCCLNIRSNKRSVYEKGEGIAGNDEFQPHKLIASLPSSAFQREAHKLELVPYLQHFLMTQKLELVSEEASKACSLKTAEFPYLNGQSCPDTASVPADLSQEPKHHHKRASVASAVGWPPIRSSRKSYVVPRSSKPNPLELSKEAVKEGNASKSDCCSGQMFVKVSQKGYLAAEDGRKMEETTTLSDSKQMNGMYTLVYYDNEGDRMLVGFIFMQHVCFHCEEATCVKELCHCHRKEVNFLSKTQTYTSESGSSAFELRLPIRLITLAVLHDYNHRRIIHLLLRCAAQLSMRQLFEIQAQLLASPIPSIDPNIVAVKFIGVSSSHGNL…	6.83	111112
MRASTSTRPIQSLRCLQWPLVAEDTSFVAMVLKVTWTSIGLARLVLDNFLPCWPTLFAWSQLRGEILMELQLELALSVPDRTRGFDLNRNACDRDVFGSDPRSCVCEQSTSHGRHKRGFEDAFFKSKDSSKDLSLLLWSDRSNKEDDDRKDTNHRSSCAIHILGSDQTNNHYWMEDNEDDGIVFNPKYVKVKMEGVAIARKIDVGLYSSYQTLKTALINMFSNSCYQKCGYINDSLTLTYQDKEGDWMLAEDLPWQMPPRQGSRPFECVRRAWHCERHQPIRGSLIQEIFRVVSQVHCPATKKNKEWQEKLPIVVLKAEEILYSKADSEAEYMDITTLWTRINEAINTIIRLDGDTETGEFLHPCIEVWLRWYGIFKWGFPDPNPILRNGEWGRDGMID…	6.46	129445
MGSVDEKLKTIGGFISNAPQPNLLDDMKLLKEMQDQTGARKAINSELWHACAGPLVSLPHMGSLVYYFPQGHSEQVAVSTKRTATSQIPNYPNLPSQLMCQVHNVTLHADKDSDEIYAQMSLQPVNSEKDVFIVPDFGLRPSKHPNEFFCKTLTASDTSTHGGFSVPRRAAEKLFPPLDYTMQPPTQELVVRDLHDNTWTFRHIYRGQPKRHLLTTGWSLFVGAKRLRAGDSVLFIRDEKSQLLVGVRRANRQQSTLPSSVLSADSMHIGVLAAAAHAAANRSPFTIFYNPRACPSEFVIPLAKYRKCVYGTQLSAGMRFGMMFETEESGKRRYMGTIVGISDLDPLRWPGSKWRNLQYSLACFSAATLIILSQVEWDEPGCCDKQNRVSSWDIETPES…	5.3	106455
MEIDLNLTASDVGKNAYCNGNCEEGRCNCCLSSSTSSCSSNSSPALVSSSTYLELWHACAGPLTSLPKKGNVVVYFPQGHLEQIASASPFSPMEMRTFDLQPQILCRVINVHLLANKENDEVYTQLTLLPLPEFLGTGLEGKELEELALNGADGDGSGVSPTRSTPHMFCKTLTASDTSTHGGFSVPRRAAEDCFPPLDYTQLRPSQELIAKDLHGVEWRFKHIYRGQPRRHLLTTGWSLFVSQKNLISGDAVLFLRGENGELRLGIRRAVRPRNGLPNSIVGNQNSCADDLARVVKAISTKSIFDVFYNPRAYHAQFVISCQKYVKSINNPVTVGTRFKMRFEMDDSPERRFNGVVLGIGDMDPLRWPNSKWRCLTVRWDKDGDHQERVSPWEIESSV…	6.44	87897.8
MTFHGGDSYTQSCVSAQGRGRDDLYMELWRACAGPLVDIPRVDEKVFYFPQGHMEQLEASTNLELNKRIPLFNLSSKILCRVIHIDPLADHESDEVYAQITLLPESNQSEPRSLDPCPPEPVKPVVHSFCKVLTASDTSTHGGFSVLRKHANECLPPLVRPDMTQATPTQDLVAKDLHGYEWRFKHIFRGQPRRHLLTTGWSTFVTSKRLTAGDSFVFLSLSMYANDCNFFLLTLLEKLYNDLYAKLACKYLFLWTLWGDNGQLRVGVRRRAQQQSSMPPSVISSQSMHLGVLATASHAVTTQTRFVVYYKPRTCQFIISLNKYLEAVNYKFSLGMRFNMSFEGEDSPERRFSGTIIGAGDISPHWANSSWRSLRVQWDEQTSILRPDRVSPWDIEPLT…	5.84	82159.7
MSTVSRDESVVLSSEDESPDESEIELGLGLSLGVRDSAHKIQKVAMLQFGKILTAEDFPASISSHSSMSSSSSSVCSSSWPCGFSVTNRSKINSDSAATTNGGRSNQVVGWPPIRASRISTLANQAKPHSVEGFKAEAGKNKNKHTEAGTPNGVGDKHKANEKSRNSRNSLYVKVNMDGVLIGRKVNLSAYSSYETLAQKVENMFLDPTALADSTGSSIKENDMVRPSRLLNGLSEYMLTYEDRDGDWMLVGDVPWGMFTNSVKRLRIMRAAEANQIDK	6.98	30257.8
MSFEETELRLGLPGNGREMARKRGFHETAAETMITMAELKLEASYGLDPNPKPPPPKGQVVGWPPIRSYRKNRLSLQKGTTSEDEIISDEQKNIGNAAAAVRFVKVSLDGAPYLRKVDFSRYSSYKQLSDALAKLFGPFTIGNCGSQAAGMKDFMNESKLIDLLNGSDYVPTYQDRDGDWMLVGDVPWQMFVGSCKRLRIMKGKEAVGLGIRVSPFVESVVAYTDNASAHSVKDFRCTEHLGYEMFYFLSSFGSAVDMVDFAGAEWKMSLISQSVAAISNLEKVTGETIVGSSSPLRNLDASDVEMSGADTTRPKKRKKEHKKEDAQLVKEQQQEMKNLENFLFGSLYSPVEFGKHEEVNGLSGEEKEAPALYIMDRSANSSLSAYEGDFGLLDESVNE…	6.62	141556
MGFPSFIFFFHNPILGLISFSVNGDFQGSGRDGLYVELWKASAGPLVEVPRVHEHVFYFPQGHMEQLEASTNQELNQKLPSFNLPSKILCHVVDVRLLAEQETDEVYAQISLIPEGNQEEPATPGPSPGECRKSKVHSFCKVLTASDTSTHGGFSVLRKHATECLPPLDMTQQTPTQELIAKDLHGYEWRFKHIFRGQPRRHLLTTGWSTFVTSKRLVAGDSFVFLRGENGELRVGVRRLSRQQSTMPSSVISSHSMHLGVLATASHAAATLTRFVVYYKPRASQFLVSLSKYKEAMNTKFLVGMRFKMRFEGEDSPERRFSGTIIGVDDISPYWPNSQWRSLRVQWDELASIQRPERVSPWEIEPFVAPASQSIPQSISVKNKRPRPPLDIPDSDNST…	6.68	79522.4
MEPNQFSVYCEGKGENGSIDLGLSLRTLQPEVVGSIEGYGEEDEHGINWGAADHTAADLYMNININMKHSNNNNGVVVVEQDYYCCEEEEEAEEVVQSKQQRWAYVKVNMDGVIVGRKVCIFQHGSYSNLALQLEDMFGRQCESGLKLFENESEFSLFYKDGDENWRSVGDVPWKQFVEDVKRLRIARKDEGFVAIHQN	4.57	22700.1
MSFIQPSVALLNMYLVFLFSGSSSDALYRELWHACAGPLVTLPRQDERLEASMNQGLEQQMPSFNLASKILCKVVNVVLRAEPDTDEVYAQITLLPESNQSEVTTPDPALPEPTRCNVHSFCKTLTASDTSTHGGFSVLRRHADDCLPPLDMSQQPPWQELVATDLHGNQWHFRHIFRGQPRRHLLTTGWSVFVSSKKLVAGDAFIFLRGENGELRVGVRRLMRQLNNMPSSVISSHSMHLGVLATASHAVATGTLFSVFYKPRTSRSTFLVSLNKYLEAQNHKLSVGMRFKMRFEGEEVPERSFSGTIVGLGDNASPGWANSDWRSLKVQWDEPSSILRPDRVSAWELEPLVASNPLSSQPTQRNKRPRPTVLPSPTADAAVLGGWKPTVESSAFSFT…	6.67	83790.7
MLSIESDWVKLDMKLSTSGFGQQDHEGGEKKCLNSELWHACAGPLVSLPTSGTRVVYFPQGHSEQVAATTNKEVDGHIPNYPNLPPQLICQLHNVTMHADVETDEVYAQMTLQPLTAQEQKDTFLPMELGIPSRQPTNYFCKTLTASDTSTHGGFSVPRRAAEKVFPPLDFSQQPPAQELIARDLHDVEWKFRHIFRGKSPYVLSICGNKCQSFSVEGQPKRHLLTTGWSVFVSAKRLVAGDSVLFIWNEKNQLLLGIRRATRPQTVMPSSVLSSDSMHIGLLAAAAHAAATNSCFTVFYNPRASPSEFVIPLTKYVKAVFHTRVSVGMRFRMLFETEESSVRRYMGTITGISDLDPVRWSNSHWRSVKVFQLYFYNSSTKTLAPFAITLSFSLLNVVR…	6.24	128436
MTSAEASIKPNSASAFKNLADSTKAPSDPPNALSAKDADIALYTELWNACAGPLVSVPRENERVFYFPQGHIEQVEASTNQVADQQMPVYDLPSKILCRIINVCLKAEPDTDEVFAQITLLPEANQDEDSVDKEPPPPPPRRFHVHSFCKTLTASDTSTHGGFSVLRRHADECLPPLDMSQQPPTQELVAKDLLGNEWRFRHIFRGQPRRHLLQSGWSVFVSSKRLVAGDAFIFLRGENRELRVGVRRAMRQHGNVPSSVISSHSMHLGVLATAWHAISTGTMFTVYYKPRTSPSEFVVPYDQYMESIKKSYTIGTRFKMRFEGEEAPEQRFTGTVIGCEDADPKRWKDSKWRCLKVRWDETSTISRPEKVSPWKIEPALAPPALNPLPMTRPKRHRSN…	6.08	94971
MELQLGLSLPLHNYAFEHPRIGNELPQTLPLLSWNDKPKDDDGSPHPEGTHFSTIQKEDEEKNPSVGWPPIETWRKKALLQHPQPPQTVENRSNQNGGPNSLFVKVKMEGVAIARKLDLRLYHSHNSLKTALIAMFTTSNYEAIDNKCWDFTLIYEDEDGDWLLAEDLPWNSFVESVRRLKVLVRKRNKE	5.81	21935.8
MSPPLLNVEEGEESRSNVTLLASPSSMESVSQNNLGFEERNYMGLSVSSSEESCMTATKPNGNKHLLNLKATELRLGIPGSESPERDPDISFRSSSQLDEKTLFPLHPSGDGRYSSPHKAVVSGNKRGFSDAMNEFSEVKLPLFCFGKYNANIGLKASSLLENLGSEMGKLKEATTQKAVQERSLENSETRPSQSEAANNNTSAPVSKAQVVGWPPIRSFRKNTLATTSKNNDEVDGKAIPGALFVKVSMDGAPYLRKVDLRNYSAYQKLSSALEKMFSCFTIGQYGAHGALGMEKMSESKLKDLLHGSEYVLTYEDKDGDWMLVGDVPWEMFIDSCKRLRIMKSSDAIGLAPRAVEKCRNRN	6.57	39872.9
MKTPANGAAAMPNSSEGGLEKKIINPELWQACAGPLANLPPAGYHVVYFPQGHSEQVAASLKKDVDGQVPNYPNLPSKLLCLLHNVTLHADPETDEVYAQMTLLPVPSFDKDALLRSDLALKSNKPQPEFFCKTLTASDTSTHGGFSVPRRAAEKIFPPLDFSMQPPAQELVAKDLHDNVWTFRHIYRGQPKRHLLTTGWSLFVSGKRLLAGDSVLFIRDEKQQLLLGIRRANRQPTNLSSSVLSTDSMHIGILAAAAHAAANNSPFTVFYNPRASPSEFVVPLAKYYKAVSANQISLGMRFRMMFETEESGTRRYMGTITGISDLDSVRWKGSQWRNLQVGWDESTGGERRNRVSIWEIEPVIAPFFICPPPFLRSKRPRQPGMPDDDSSDLDGICKR…	6.71	122841
MAFQKDLNLEATELRLGLPGTSPDDQSSPINRIISNKRALPSDDQNPPESGRDSNSDLTKSDQENPPPTKAQVVGWPPVRSFRKNCFQAKKKDEGAATAAGGMFIKVSMDGAPFLRKVDLKTYQGYPELLQALENMFKFSLGNFLKHGSRDHNRFRMKIYSIFFVSFVREKGITGRNLFRLMKIKMVIGCSLVTMFMGSCKKLRIMKGSEAKGLSCGSV	9.81	24420.3
MESEQNDEYRAILINFEQTELRLGLPGGDGGDTSGGKSSSAAKRGFMETVDLKLNLSSSMAPEKEEATNLEETKSSSQRPNDFAKPPSKAQVVGWPPVRSSRKNLGAQRTGGEDGGGGGGAFVKVSMDGAPYLRKVDLKLYGSYKDLSHALAKMFSSFTVGTCESEGMKDFMNERKLVDLLNGSEYVPTYEDKDGDWMLVGDVPWEMFVDSCKRLRIMKESEAIGLAPRTMEKSKNRS	5.34	26073.3
MSVFWGDSFAPELFSLTYMRLGMKAPPNGFLPNSGEGERKNINSELWHACAGPLVSLPPVGSLVVYFPQGHSEQVAASMNKETDFIPSYPNLPSKLICMLHNVTLHADLETDEVYAQMTLQPVNKYEKEGLLASDIGLKQNRQPAEFFCKTLTASDTSTHGGFSVPRRAAEKIFPPLDYSMQPPAQELVARDLHDNSWTFRHIYRGQPKRHLLTTGWSVFVSTKRLFAGDSVLFIRDEKSQLLLGIRRANRQQPALSSSVISSDSMHIGILASAAHAAANNSPFTIFYNPRASPSEFVIPLAKYNKAMYAQVSLGMRFRMMFETEESGVRRYMGTITGISDMDSVRWKNSQWRNLQVGWDESAAGERPNRVSIWEVEPVVTPFYICPPPFFRPKFPKQP…	5.99	124418
MGFCTRVECSLFRLLCNLSVTSGKILNILPYGRTSRSTFLVSLNKYLEAQNHKLSVGMRFKMRFEGEEVPERSFSGTIVGLGDNASPGWANSDWRSLKVQWDEPSSILRPDRVSAWELEPLVASSPLSSLPAQRNKRPRPAVLPSPSTDAAVLDGILLTLSSYVLGGWKPTVESSAFSYTEPQRGRDLYSSPKFSTAASNSLGFNGNNSLGAVSSNAYWSNTSMVENVMDTSSHGAKREPVEKKQNTRNGCRLFGFQLLGNSNVEEASPVSTPKMVGEDRPVPPIDTAFDQHFDPSNIHRSDMPSVSCDADKSCLISPLESQSRQIRSCTKVQMQGIAVGRAVDLTRFNQYDDLLRKLEEMFDIEGELCGSVKKWKVVYTDDEDDMMMVGDDPWKKIFI…	5.74	49299.7
MDSKLSFQNHLNLEATELRLGLPGTDGSADNSCGVRTNKRNLQNHSAPPPKSQVVGWPPIRSFRKNTLLPKKTEATTAAEGGGIYVKVSMDGAPYLRKVDLGVYKGYPELVKGLEEMFKFRMGTYREREGYQGSDYAPTYEDKDGDWMLVGDVPWQMFISSCKRLRIMKGSEVGGLSCGV	8.91	19972.8
MEAVGRNMANQFASLKETELCLGLPGAGDLTLKASGKRGFSETVDLKLNIQSKDGGGVDVNENIKNIPVNVDGQKSLCSKDPAKPPVKAQAVGWPPVRSYRKNIMAQKNTSGEGTEKASGGSAAAFVKVCMDGAPYLRKVDLKMYQSYQELSDALAKMFSSFAMGEYGTEGTIDFMNERKLMDLLNSSEFVPTYEDKDGDWMLVGDVPWEMFVDSCKRLRIMKGSEAIGLAPRAMEKCKSRS	7.51	26404.2
MVNMLETDLCLGLPGGGGGGGGGEPETPKGNGKRGFSETVDLKLNIQSKPVVTVDLSTTQNMKSTDSEDLSSKDPAKPPAKAQVVGWPPVRSYRKNAMSQKNPDAGEKGSGSAMFVKVCMDGAPYLRKVDLKTYKSYQELSNALAKMFSSFTMAGEYGAQGMIDFMNESKLMDLLNSSEYVPTYEDKDGDWMLVGDVPWEMFVDSCKRLRIMKGSEAIGLAPRAMEKCKSRS	6.41	25180.8
MAFEAGLNLDATELRLGPPGVDGNKQEPQSLRIINNKRPLLPESNQSSSASNISVSDDNLETPPPSKAQIVGWPPVQSFRRNSLQGKKTAAAATAAGESTANYVKVSMDGAPYLRKIDLSLYKGYTELLQALEDMFKFTVGEYSEREGYKGSEYVPTYEDKDGDWMLVGDVPWEMFMSSCKRLRIMKGSEAKGLGCVA	5.2	21708.5
MNKGLSSSKAFGCIDFGASNLGVNSSLVLLDLTEMRLSAAGFSPQPPEGEKRVLNSELWHACAGPLVSLPAVGSRAVYFPQGHSEQRINNSTHFSSKFKICLLSTCIWSSFLFLVIAFARCLAVAISTNKEVDAHIPSYPSLPPQLICQLHNVTMHADIETDEVYAQMTLQPLSAQEQKEPYLPAELGAPSKQPTNYFCKTLTASDTSTHGGFSVPRRAAEKDFTQQPPAQELMARDLHDNEWKFRHIFRGEFCEVNVLKTASTPRLAAVFMSNYIFDAGQPKRHLLTTGWSVFVSAKRLVAGDSVIFIWFVFMPFLTRYLFIQIYIIFAMLGFLRNEKNQLLLGIRRASRPQTMMPSSVLSSDSMHLGLLAAAAHAAATNSRFTIFYNPRASPSEFII…	6.46	110844
MSLPLLNSEEEVLGNVPVVAASPSMDCLSQNGAKFRERNYLRLSPCSSVDSSAMSNLSEENKRNLNLKATELRLGLPGSMSPEREQEFSLMSAGEPDEKTLLQLLPSKDGYSVVSQKNIVSGNKRGFSDTMEGYSEVKGPLYTERNWMFHAASSDPESSYPVSQGKFHANSGLNAMLSSRPSGPQPNATKEFPLKGLQEWPCETKGTGHVHKGASNDHNNAPASRAQVVGWPPIKSFRKNSLVANSKNNDEVDGKPGSGALFVKVSMEGAPYLRKVDLRTYSTYQELSSALEKMFSCFTIGQCGSHGAPGRDILSESKLRDHLHGSEYVLTYEDRDGDWMLVGEIPWEMFIDSCKRLKIMKGSDAIGLGTV	6.11	40607.7
MTLSEQNPAEFCKETKEFCKFRPVFGVFDCFCLVGLEGEGLFEELWKACAGPLVEVPFNGERVFYFPQGHMEQLEESTNHELNHQIPHFDLPSKILCRVVNIRLLAEKETDEVYAQITLQPEADQSEPQCPDPEPPERTRPTVHSFCKILTASDTSTHGGFSVLKKHATECLPPLDMSQSTPTQELAAKDLHGHEWKFKHIFRGTLQLIMMTKAVCQPRRHLLTTGWSTFVVSKRLVAGDAFVFLRGDNGELRVGVRRQARQKSVMPSSVISSHSMHLGVLATASHAVRTQTFFVVYYKPRTSQFIIGLNKYLETIKNRYEVGMRFKMRFEGEESPERRFTGTIVGVGDISPVWSDSKWRSLKVNIIQWDEAAAIQRPERVSPWEIEPFVPSASLNFTH…	6.2	83770.4
MAVSDDRDLNLQATELRLGLPGSDQPDHRCGSQPNKRPFSEIDKENDSRVSDVENGSDPSSQPPPSKAQIVGWPPVRSYRKNCLVGKKSEAESCNGGYVKVSMDGAPYLRKIDLTIYKSYVELVKALENMFNFNLVSLMIGSTSGGYSEKEGFNGSDYVPTYEDKDSDWMLVGDVPWEMFICSCKRLRIMKGSEAKGLGRL	5.35	22316.2
MEKKNMGFEETELRLGLPGNSGGGGGGGESGDVGARKRGFAETVSSDTISKVDLKLNLSSKEAAGNDVVVDPSSGNKDKTALVTDPAKPPAKAQVVGWPPVRSFRKNNMLAFVKVSMDGAPYLRKVDLKMYKSYKQLSDGLATMFGSFTTIGNCGSQEMKDFMNESKLIDLLSDSDYVPTYEDKDGDWMLVGDVPWEMFVESCKRLRIMKGKEAIGLGTTKGHGEMQEQKLKQEKTKGCSFSRFDLISTYSNYRSIDDLVKVEIGIKDSRNERSNKATKLTTVY	8.53	31195.5
MEKQPLGLEITELRLGLPGNGEKNEKKRAYVAIVGKDEPTRDEIEQKNNMSKGQVVGWPPVCSYRRKNSFEEKESLHENKNSKIYVKISMDGAPFLRKLDLGSHNGYSGLALALEKLFACFGTGKTSKHGKGSDYVPIYEDKDGDWMLVGDVPWEMFAKSCKRLRIMKRSEAKGFGLQFKDL	9.11	20576.7
MEAVGRNMPNQFVSLKETELCLGLPGGGDPPPDLTLKASGKRGFSQTIDLKLNIQSNDGGGDVRVGVGLNDDIKNIPTSVHGPKSLGSKDPAKPLVKAQAVGWPPVRSYRKNVMAQKNTSGEGTENANGGAAVAFVKVCMDGAPYLRKIDLKMYQSYRELSDALAKMFSSFAMGKYSGTQGMIDFMNERKLMDLLNSSEFVPTYEDKDGDWMLVGDVPWEMFVDSCKRLRIMKGSEAIGLAPRAMEKCKRRS	8.93	27492.6
MDSKPSDLNLGATELRLGLPGTAAESDGSADNSSGVRTNKRNLQNDSAPPPKSQVVGWPPIRSFRKNTLLPKKTESTTAAEGGGIYVKVSMDGAPYLRKIDVGLYKGYPELLKGLEEMFKIRIGAYCESEGYRGSDYAPTYEDKDGDWMLVGDVPWRMFISSCKRMRIMKGSEVGGLRN	8.78	19631.3
MSSVEDKLKTPMGLVNNTPQTNLLDEMKLLKQMQDQTGARKAINSELWHACAGPLVSLPHVGSLVYYFPQGHSEQVAVSTKRTATSQIPNYPNLPSQLMCQVQSITLHADKDSDEIYAQMSLQPVNSERDVFLVPDFGLRPSKHPNEFFCKTLTASDTSTHGGFSVPRRAAEKLFPPLDYTMQPPTQELVVRDLHDNTWTFRHIYRGQPKRHLLTTGWSLFVGSKRLRAGDSVLFIRDEKSQLLIGVRRANRQQTTLPSSVLSADSMHIGVLAAAAHAAANRSPFTIFYNPRACPSEFVIPLAKYRKCVFGTQLSAGMRFGMMFETEESGKRRYMGTIVGISDLDPLRWPGSKWRNLQVEWDEPGCCDKQNRVSSWEIETPESLFIFPSLTSGLKRPLH…	5.27	100534
MELQLELALCVSDPTRGFDLNRAACDGKDVFGSDPRSCLCAESTSHGRHKRGYEDAFFKSKDSFKELSLLLWSGHPNKEDDDWKDTNQRSSCALHINAGEENKVMGWPPIKSWRKKYLHELQQDGFGSDQIPNHYWMEEDEDDEIVFNPKYVKVKMEGVPIARKIDVGLYSSYQTLETALIHMFSDSCYQKCGSSNANLTLTYQNKEGDWLLAGDLPWQTFLESVQCMKIIRRQPSN	5.3	27200.5
MSRRPELLDLISGDREWELNRIGVGSSVSENNKLELRLGLPGEDRLAEGSNCLNFSHESDESHLSSAKLFPSCLNIRSNKRALCDEFRPHKLVFSEKTAEKVAPLIHCLGASLPSSAFQREAQKLSQPSQSLYLEHLLMPQRLDLVSEEPSKTCSLKTAEFPYSTGKSCLNNGSVPAESSEPKHHDKRASVASAVGWPPIRSFRKNFAGPRSSKPNSLVLSKEALQDENGSKLSHCSNGQMFVKVCMDGIPIGRKLNLQAYNGYDQLSAGIDELFHCLLAAQRNYLAAEDGRKVEETTSLSDSKHENGLYTLVYYDNEGDRMLVGDVPWNMFVSTVKRLRVLRNAVVATEMK	7.13	39097.3
MASSEVSINPNSASVPFNDHADSTKLTSDPPNALSARDADFALFTELWNACAGPLVSVPRENDRVFYFPQGHIEQVEASTSQVADQQMPVYDLPSKILCRVINVHLKAEPDTDEVFAQITLVPEANQDEHAVDKEPPPPPPRRFHVHSFCKTLTASDTSTHGGFSVLRRHADECLPPLVGTSVFPGQPRRHLLQSGWSVFVSSKRLVAGDAFIFLRGENGELRVGVRRAMRQHGNVPSSVISSHSMHLGVLATAWHAISTGTMFTVYYKPRTSPSEFIVPYDQYMESIKKSYTIGMRFKMRFEGEEAPEQRFTGTIIGCEDADPKRWKDSKWRCLKVRWDETSTISRPEKVSPWKIEPALAPPALNPLPMTRPKRPRSNMVPTSPDSSVLTREGSSRVT…	5.74	93598.2
MAMELQLSLALFPTNPTKPFDLNTHHRALPCLDFDSISRKKRPLDIDPSSAFRRTLPLLLWNDHPNNGDDDPKNPNSASSNHPDNPEEQEIELVGWPPLKKRRKTLFVQKRIGRAVAIRRPAMENDGGVYRELNSNNSRYVKVKMEGVGIGRKVDIRQHHCLDALRATLMNMFDKPDSDGYNLTYQDTDGDWLLAEDVTWRDFIRTVQRIKLEKNGG	8.51	24928.2
MSTSETVPQSPESDMAQISFDETELTLGLPGNKVNAKRGFHDTVDAGVGSSTSEPRDGRNEPELISSGDGQKRAVMGWPPVRSYRRKTIEMRCKYVKVAADGAPYLRKLDLEMFNGYRDLFIAFEELFTSFPICCDYLEEGNNLNPMKRGDEYLPTYEDKDGDWMLVGDVPWKLFIESCKRIRLMKGSDTIGAAPRTP	5.01	22276.2
MSTPLEHDYIGLTESIPSLETSETSSDGPNSAGLNLKATELRLGLPGSESPERHDGLDDNNGYPHKTSISGAKRGFSVAIDRASAKWVLPTSAGSEADSPKNGGLFSPRGVNENKTQPPVSAVSGVKDGISPSAKPLHEEKPQLSAPAAKAQVVGWPPIRSFRKNSMATQSPKTTEDAEGKSGSGCLYVKVSMDGAPYLRKVDLKTYGSYVDLSSALEKMFSSFTIGHCGSNGFPNRDALNESRLMDLLHGSEYVLTYEDKDGDWMLVGDVPWEMFTESCTRMRIMKSSEAIGLAPRAMEKCRNRN	5.93	32976.9
MELQLGLSLIPAKPFDLNNSLLLHDTASCLDLNSTIRKKRPLHVDPSLAFRRTLPLLLWNDHPNNGDDDDNDPHSASNDSDEEEEEEDNRLVGWPPLKKRKTRSLMQKRRGRGRPAVNGGGLNWNSNSRYVKVKMEGVGIGRKVDLSQYHCFDELRATLMKMFDEMDPDGQRLTYQDIDGDWLLADDVTWRNFIGTVQRIKLEKNRG	5.98	23780.8
MSSAETVPESPESDLTHINFDETELTLGLPGAEFRPTQPNKVYHKPNANRRAFHEADDAGAGNSTRKKPAAMGWPPVRSYRKKTTEMNYKYVKVAADGAPYLRKLDLQMFNGYHQLFKAFQELFPSYPICFDYVNEGNNLNPVKRAYEYLPTYEDKDGDWMLVGDVPWKLFIESCKRIRLMKGSDGNGNGIGFLPFISPRAP	7.72	22948
MSIPLEHDYIGLTDSVPSLETSEMSSDTRNNPGLNLKATELRLGLPGSDSPLRDDGLDDTNGYPHKTSVSGAKRGFSVAIDRASSKWVLPASAGSEPDSTKTGGLFSPGVVTENMTQPPASPVSGAKDGISTLPKPLLEEKPQLSPPAAKAQVVGWPPIRSFRKNSMATQPPKNTDDADGKMGSGCLYVSMDGAPYLRKVDLKTYGSYLDLSSALGKMFSSFTIVTFSLLLLHSLNQGHCGSNGIPNRDALNESRLMDLLHGSEYVLTYEDKDGDWMLVGDVPWEMFTESCTRMRIMKSSEAIGLAPRAMEKRRNLN	5.62	34228.7
MGSLIDFEQTELRLGLPGGDAVKKRGFTQTLDLKLNLAADSDQRPKTTDTNAVSTSVGTDLPKPPPPKAQVVGWPPVKSLRRNIVAPKKSTEETEKGATVSGCADAAAFIKVSMDGAPYLRKVDMKMFGSYQELSDALSKMFASFTTGNSGAQKMKNYANESKSMDVRNETDYVPTYEDKDGDWMLVGDVPWNMFVDSCKRLRIMKGFEAIGLAPRALEKCKTRN	8.85	24684.2
MSPPPHDVGEGEECRSNVTLLASSNTMESVSQNNLGFEERNYMGLSDSSSEESCMTATKSDENKPLLNLKATELRLGLPGSESPERDSEISLRNSSQLDEKPLFPLHPSNDGLYPSPHKAVVSGNKRGFSDAMNEFSEGKYHSNLGLKPGSLLENLGSQMGKVKEASTQKVVQERPQENSETRPSQNETANNNTSAPVSKAQVVGWPPIRSFRKNTLATTSKNNDEVDGKAMPGALFIKVSMDGAPYLRKVDLRNYSAYQELSSALEKMFSCFTIGQYGAHGALGVEKMSESKLKDLLHGSEYVLTYEDKDADWMLVGDVPWEMFIDSCKRLRIMKSSDAIGLAPRAVEKCRNRK	5.69	39109.8
MNTFHSHTQSPAAAAEYFKMRRWPETQLGSPPLQQQQQQMEEEEEEEEEEDFAAVIPPVTVVLEGRAICQRISLHKHASYESLAKALRRMFVDDDDGGCGGGGGGEPSCDRQLDLANAVPGHLVAYEDIENDLLLAGDLNWNDFVRVAKRIRILPIKANSRRGRGNN	4.94	18641.8
MKTPANGVASSAAAPNSCEGGLEKKIINPELWQACAGPLVNLPPAGYHVVYFPQGHSEQVAASLKKDVDAQIPNYPNLPSKLLCLLHNVTLHADPETDEVYAQMTLQPVPSFDKDALLRSDLALKSNKPQPEFFCKTLTASDTSTHGGFSVPRRAADKIFPPLDFSMQPPAQELVAKDLHDTVWTFRHIYRGQPKRHLLTTGWSLFVSGKRLLAGDSVLFIRDEKQQLLLGIRRANRQPTTLSSSVLSSDSMHIGILAAAAHAAANNSPFTVFYNPRASPSEFVIPLAKYYKAVSANQISLGMRFRMMFETEESGTRRYMGTITGISDLDPVRWKGSQWRNLQVGWDESTGGERRNRVSIWEIEPVIAPFFICPPPFFRSKRPRQPGMPDDESSDLDSI…	6.3	123145
MAFEKDLNLEATELRLGLPGTSPDNQSPPINSNKRALPSDDQNLPDSARENNSDPTKCTPETPPPTKAQVVGWPPVRSFRKNSFQVKKKDEAAAAGGMFIKVSMDGAPFLRKVDLKIYGGYPELLQALENMFKFSLGKFCEREGYNESEFVPTYEDKDGDWMLVGDVPWEMFMSSCKKLRIMKGSEAKGLGCGAV	5.41	21603.6
MAFDFPESSLCHHHLHPLDSFAIHFSFSFFFTTQTGSLYSLWGSSALPRLLRFFSFREPCCCFQRRRDWHGCVLAFTELVIRFPLDLWVISYSMKAPPNGFVPNSGEGERKNINSELWHACAGPLVSLPPVGSLVVYFPQGHSEQVAASMNKETDFIPNYPNLPSKLVCMLHNVILHADPETDEVYAQMTLQPVNKYEKEALLASDIGLKQNRQPAEFFCKTLTASDTSTHGGFSVPRRAAEKIFPPLDYSMQPPAQELVARDLHDNSWTFRHIYRGQPKRHLLTTGWSVFVSTKRVFAGDSVLFIRDEKSQLLLGIRHANRQQPALSSSVISSDSMHIGILASAAHAAANNSPFTIFYNPRASPSEFVIPLAKYTKAMYTQVSLGMRFRMMFETEESG…	6.15	131480
MRLSAAGFSPQPPEGERRVLNSELWHACAGPLVSLPAVGTRVVYFPQGHSEQVAASTNKEVDAQIPNYPSLPPQLICQLHNLTMHADAETDEVYAQMTLQPLSAQELKEAYLPAELGSPSRQPTNYFCKTLTASDTSTHGGFSVPRRAAEKVFPPLFMISSDDIGAMQDFSMQPPAQELIARDLHDNEWKFRHIFRVGLGEMESWLPCFNCLDVLDMFVAGQPKRHLLTTGWSVFVSAKRLVAGDAVLFIWNEKNQLLLGIRRASRPQTVMPSSVLSSDSMHLGLLAAAAHAAATNSRFTIFFNPRASPSEFVIPLTKYVKAVYHTRVSVGMRFRMLFETEESSVRRLLSASLVEYRRFDNWDSMCIHIFVIFLRYMGTITGISDLDPVRWQNSHWRSV…	5.76	111348
MEINGCSEKDGVCPQLLDLIPKHRQWVAAGDVAGKPHTSDDKKLELRLGLPGEGDWSGKGKDEAVPYFGCFPVSHKFSPSENPWPPSPNFHGKFQAAKLPAFCLSSMGKESVSQPCCTKMVDLHNAEPKSFPSSANTTVSNSSQKRTAPAPVVGWPPIRSSRRNLTSSSGSFSKPVSESSLDAAPSKLPAPSKKAVEVGGKGLFVKINMDGVPIGRKIDLNAHDSYEKLSSAVDELFRGLLAAQRDSPAGGVWKKQDDEKPITDYDKVDVSEYSRLLEATEDGARLCALSEGREVFKLRLERRHLNYDIISSN	8.08	34006.4
MATNGVHQLQITELRLGLPGTAHTPTSKNENKRVCSKSSTDDDDGDRRCSKRNRVVGWPPVCSHRRRSSGNDRDLSETQTSKMYVKVSMDGAPYLRKLDLRILKGYSDLGVAMENLFDRAIRCSDYVSIYEDRDGDWMLVGDVPWGMFIESCKRVRIMKRSEAKGSDFSSKQV	9.14	19626.2
MAFQNCLNLDATELRLGPPGAADDDNNNNNQEQPQSLRIINNKRPLLPESNQSSSASNISVSSDSTLQTPPPTKAQIVGWPPVQSFRRNSLQSKKTAVATAAQESSGNYVKVSMDGAPYLRKIDLCSYKGYPELLQTLQDMFKFRVGEYSEREGYKGSEYVPTYEDKDGDWMLVGDVPWEMFMSSCKRLRIMKGSEAKGLGCVA	5.64	22628.4
MLETDLCLGLPGGGGGGGGGGGGGEPETPKANGKRGFSETVDLKLNIQSEPLATVDLTPQNMKTNNNTSTDEKSLTSKDPAKPPAKAQAVGWPPVRSYRKNVMAQKSPDSGSAMFVKVCMDGAPYLRKVDLKMYKSYQELSNALAKMFSSFTMAGDYGAQGMIDFINESKLMDLLNSFEYVPTYEDKDGDWMLVGDVPWEMFVDSCKRLRITKGSEAIGLGIPKSDGEMQKQKLKRWWVAA	6.41	26181.9
MEPPLGLLSSSAIGSSGASNDENSVSKAKEVDKHQPDLSSEEFSSPVEAELELGLGLSLGSGISTGKGKHSGWGERGRILTAKDFPSAISPGGSSSSSSARFSGRAAAVSGVKRAAEPVAHHGDSPPPAVSQVVGWPPLRAYRINSLVNQAKNRKSGDEKELLRSNGVAVKIHDGKNMSATDTEKGPLGFVKVYMDGVLIGRKVDLNAHSCYGTLALMLEDMFFKPAGSAPSSGSSGDYDEQAPKPSKLLTGSSEFVLTYEDKEGDWLLVGDVPWKMFLGSVKKLRIMRTSEAKGLEVQDVKGRSERNGMKPI	7.79	33071.3
MKLSTSGFGQQDHEGGEKKCLNSELWHACAGPLVSLPTAGTRVVYFPQGHSEQVAATTNKEVDGHIPNYPNLPPQLICQLHNVTMHADVETDEVYAQMTLQPLTAQEQKDTFLPMELGIPSRQPTNYFCKTLTASDTSTHGGFSVPRRAAEKVFPPLDFSQQPPAQELIARDLHDVEWKFRHIFRGQPKRHLLTTGWSVFVSAKRLVAGDSVLFIWNEKNQLLLGIRRATRPQTVMPSSVLSSDSMHIGLLAAAAHAAATNSCFTVFYNPRASPSEFVIPLTKYVKAVFHTRVSVGMRFRMLFETEESSVRRYMGTITGISDLDPVRWPNSHWRSVKVGWDESAAGERQPRVSLWEIEPLTTFPMYPSLFPLRLKRPWHPGVSSVHDELILVYWLEYNR…	5.83	95201
MKRQFASFGNVRDLNFEATELRLGLLPRTEQERESQSESAEQSKSDSRSGSEYSISSTNPSSDAEHLHCREIHIIDHPPPAKAQVVGWPPVRSYLKNMIIEAEKKIQKEIMNKEVGSSGMYVKVSLDGAPYLRKIDLKLYQSYQQLLDVLEDMFNIKLGNIKIYTFYMKIDFKLKLMHLHINLYGGNSEKEGNNWCEYALTYEDKDGDWMMVGDVPWNMFICCCKRLRIMKGSDARGLGCL	6.6	27733.8
MACNGGDSYTQSCVSTQGSGRNDLYTELWRACAGPLVDVPRVDERVFYFPQGHMEQLEASTNLELNKRIPLCNLSSKILCRVIHIELLADHESDEVYAQITLMPESNQNEPNSLDPCPPEPARPVVHSFCKVLTASDTSTHGGFSVLRKHATECLPPLDMTQATPTQDLVAKDLHGYEWRFKHIFRGQPRRHLLTTGWSTFVTSKRLSAGDSFVFLRGDNGELHVGVRRRARQQSSMPSSVISSQSMHLGVLATASHAVTTQTRFVVYYKPRTCQFIISLNKYLEAVNNKFSVGMRFNMSFEGEDSPERRFSGTIIGATDISPHWPNSSWRSLRVQWDEQTSILRPDRVSPWDIEPLTSSAVTGLSQPISKNKRPRQSTPAHDGADLPKPALWDSGLAE…	6.05	77187.4
MANRGGGSFSSQGGGGDGLYTELWKASAGPLVEVPQVNDKVFYFPQGHMEQLEASTNHELNQKHPLFKLSSKILCRVVDVRLLAEQETDEVYAQITLMPDSNQEEPTNPDPSPPECRKPKVHSFCKVLTASDTSTHGGFSVLRKHATECLPPLDMTQQTPTQELVAKDLHGNEWRFKHIFRGQPRRHLLTTGWSTFVTSKRLVAGDSFVFLRGENGELRVGVRHLARQQTSMPSSVISSHSMHLGVLATASHAVLTLTRFIVYYKPRASQFIVSLNKYIEAMNRKFLVGMRFKMRFEGEESPERRFSGTIVGVDDISPHWPNSKWRSLRIQWDELASIPRPDRVSPWEIEPFVAPTSPSIPQSVSVKNKRLRPPLDIPDSDNSTVTTLRHPGSTQSHDD…	7.09	77641.6
MECTLGLFRTSGVGGSVSGSAINDPNESRMEIFEKDFVGKIPIEPSPCPASSGLELGLGLAVGGCGKVSGGTWGERGRILTARDFPVLGGSSVSSCSSSSCFHGRESNGSVAVSGTKRAADSAPNDGGSPTALNQVVGWPPIRTYRMNSLVNQAKTARAEEDEQSKDNKTCDVDGKGHLGFVKVNVDGVVIGRKVDINAHSCYETLALMLEDMFFKSDGKSGDKEQGQKLSKLLDGSSEFVLTYEDREGDWMLVGDVPWRMFLSSVRRLRIMRTSEANGLAPRSQDKKAKQRSKPI	7.55	31659.7
MEAVGRKMPNEFVSLKETELCLGLPGGGGGGGDQPLEMTLKPSGKRGFSETVDLKLNIQSKDGGSGGGAGGGKNVAANVVDGQTNLCSKDPAKPPAKAQVVGWPPVRSYRKNVMAQKNTSGEGAEKGNSGSAAFVKVCMDGAPYLRKVDLKMYQSYQELSDALAKMFSSFTMGEYGTEGMIDFMNERKLMDLLNSSEFVPTYEDKDGDWMLVGDVPWEMFVDSCKRLRIMKGSEAIGLAPRAMEKCKSRS	7.52	26877.7
MESKPAFQSDLNLEATELRLGLPGIATETDDTLENSPGLKTNNKRNLQNDSAPPPKAQVVGWPPVRSFRKNTLQMKKPATATAADYGGGFFVKVSMDGAPYLRKIDLGLYEGYPELLKALEDMFKFTIGKKTPEVIKFGITGQYSEREGYKGSDFSLTYEDKDGDWMLVGDVPWQMFISSCKRMRIMKGSDGCDV	5.67	21693.7
MSNRLEHNYIGLTEDSSMERIPEKNSSSSSSASSSSPPGTNEEKKCATVSFKDTELRLGLPGFQSPERKSGTGISLFSNDFEDKQSNGFCSSRILKNLVSGSKRGFSDAIDGSSLKWGFSGSNGLSEGTMLFSPKSGMPPSNVNAPQACGSLKAVKEVVPVKPSSKPAQEKKPQVSENGGAPLAKAQVVGWPPIRSFRKSTMTSTNSTKKADEAEGKSELTGCLYVKVSMEGAPYLRKVDLKLCSNYSELSLALEKMFSCFTIGQCGTEGLPTKERLSESNLTDFLHGSEYVLTYEDKDGDWMLVGDVPWEMFTDSCRRLRIMKGSEAIGLAPRAIEKCKNRN	8.46	37199
MANESLGLEITELRLGLPGNNDKNEKKRAYADIVDEDEPTRDDVDRKNNTTSKGQVVGWPPVCSYRKKNSFGEKESLLKNENSKMYVKISMDGAPFLRKLDLGSHEGYSDLAVALEKLFGCFGTGKTSKHGESSDYVPIYEDKDGDWMLVGDVPWEMFIESCKRLRIMKRSEAKGFGLQFKDL	5.57	20683.4
MAKMAVSNDRDLQATELRLGLPGSNEPDRCSGLKPNKRPFSEIDKESNSSVSDAGNCLNQSSQSPPSKAQVVGWPPVRSYRRNCLAGKKNEVESCGGVYVKVSMDGAPYLRKLDLTIYKSYTELVKALENMFKFNLRSYSEKEGFNRSDYAATYEDKDGDWMLVGDVPWEMFISSCKRLRIMKGSEARGLSENRC	8.68	21874.7
MAEKKKMEFEETELRLGLPGNNNNNNGGGGGESGEITARKRGFAETVSSETISKVDLKLNLSSKEATGDDDGVAADRNPRNDDKAVLTADPAKPPAKAQVVGWPPVRSFRKNNMLAFVKVSMDGAPYLRKVDLKMYKSYKQLSDALAAMFGSFTTISNCGSQEMKDFMNESKLMDLLSGSDYVPTYEDKDGDWMLVGDVPWEMFVESCKRLRIMKGKEAIGLAPRAVEKCKNRS	7.59	25779.3
MRLSAAGFSPQPPEVHARFMSFCCLGVLFCERRVLNSELWHACAGPLVSLPAVGSRVVYFPQGHSEQVAASTNKEVDTQIPNYPSLPPQLICQLHNLTMHADADTDEVYAQMTLQPLSAQELKEAYLPAELGTPSRQPTNYFCKTLTASDTSTHGGFSVPRRAAEKVFPPLDFSMQPPAQELIARDLHDNEWKFRHIFRGGNEKNQLLLGIRRASRPQTVMPSSVLSSDSMHLGLLAAAAHAAATNSRFTIFFNPRCEASPSEFVIPLAKYVKAVYHTRVSVGMRFRMLFETEESSVRRYMGTITGISDLDPVRWQNSHWRSVKVSWLGRVNSRRAAAKSVLVGNRTINNISNVSITVSTSTEATMANWTAFFYGYSCLTSLYVFLLGIKDSDLGMNSP…	6.01	99859.3
MQFVPVHFIKFQALSSMDPYAHQEDHDHLIDLGLSLRALQPQHHPLPRPHSMNWAAVAAAAQLSDLYKKGEECEEEAEVVQSKRRRGYVKVNMDGIIVGRKVCIFEHGYYSSLALQLEDMFGRQCEFGLKLFETESEFSLFYKDGDENWRSVGDVPWKQFVEGVTRLRIARKDEAFVVLHQN	5.83	21052.9
MSFEETELRLGLPGNNVRSEVRRKRGFHEEPGTNHKPPLPKAQVVGWPPIRSYRKNSLALRKGSNEEVVLISRNKNGNIGAARFVKVSLDGAPYLRKVDLTMYNSYKQLSHALAKFFGAFTIGHYGSQAVGMKDFMNESKLIDLLNGSDYVPTYQDKDGDWMLVGDVPWQMFVESCKRLRIMKGKEAINLGKIDRFVCFQYQ	9.62	23005.5
MASSGGGSGVVSEESMSTICKDENVMLSSEGSSCPDESEIELGLGLSLGVRDSRKIQKVSVAQFGRILTAEDFSSSICSSSSLSGVNVTNGSKRNSDSAATINGGRGSQVVGWPPIRASRISTLVNQAKSHSVEEFKAVAGKNKNKHTEAGTLNGVSDRNKANEERRTSRNSVYVKVNMDGVLIGRKVNLSAHSSYETLAQTVENMFLDPTALVDSTGSSIKEHDIVRPSRLLNGLSGYMLTYEDKEGDWMLVGDVPWGMFTQSVKRLRIMKAAEANQIGR	7.71	30112.7
MEIDLNQTASEVGKNAYCHGNCEEGRCNCCLSSSTSSCSSNSSSTPASSSTYLELWHACAGPLTSLPKKGNAVVYFPQGHLEQIASASPFSPMNMATFDLQPQILCKVINVHLLANKENDEVYTQLTLLPLPELLGTGVEGKELEELALNRAADGDGSGGSPTRSTPHMFCKTLTASDTSTHGGFSVPRRAAEDCFPPLDYTQLRPSQELIAKDLHGVEWRFKHIYRGQPRRHLLTTGWSIFVSQKNLISGDAVLFLRGENGELRLGIRRAVRPRNGLPDSIVGNQNSCANDLTRVVKAVSTKSAFDVFYNPRAYHAQFVVSCQKYVKSINNPVNVGTRFKMRFEMDDSPERRFNGVVVGIGDMDPFRWSNSKWRCLTVRWDKDSDHQERVSPWEIDPS…	6.38	86292.7
