# Supplementary material for: Genome-Wide Identification and Comprehensive Characterization of the Aux/IAA Gene Family in Cucurbita moschata and Its Response Analysis to Abiotic Stress
Source: Research Square preprint supplement (doi:10.21203/rs.3.rs-8529495/v1), 2026-01-28
Supplement: Supplementary file 4 [file 82ec54191cf58500041436ae.xlsx]

## Sheet: Sheet1
Additional file 3 FPKM value of C. moschata AUX/IAA genes in four major tissues
GeneID	名称	Fruit	Leaf	Stem	Root
CmoCh01G000950	CmIAA1	4.04±0.16	2±0.28	5.45±0.06	5.05±0.15
CmoCh01G001250	CmIAA2	0.06±0.1	0.59±0.06	1.28±0.03	0±0
CmoCh01G001260	CmIAA3	0±0	0.4±0.34	2.14±0.24	0.12±0.11
CmoCh01G014970	CmIAA4	3.52±0.08	2.16±0.13	2.62±0.07	4.7±0.05
CmoCh01G015610	CmIAA5	7.16±0.1	4.55±0	5.72±0.02	6.35±0.05
CmoCh01G020170	CmIAA6	1.42±0.06	2.12±0.12	2.67±0.04	3.31±0.07
CmoCh02G008800	CmIAA7	4.14±0.15	3.02±0.04	5.26±0.06	3.94±0.05
CmoCh02G009300	CmIAA8	3.91±0.16	3.49±0.08	4.08±0.03	5.27±0.11
CmoCh02G017600	CmIAA9	5.02±0.15	3.04±0.21	4.05±0.04	4.68±0.09
CmoCh02G018170	CmIAA10	1.8±0.11	3.5±0.02	2.57±0.05	2.56±0.17
CmoCh04G007210	CmIAA11	0.97±0.08	1.88±0.04	2.08±0.11	4.4±0.06
CmoCh04G015610	CmIAA12	0.72±0.16	0.08±0.11	1.23±0.04	0.28±0.1
CmoCh04G020040	CmIAA13	5.55±0.1	4.84±0.02	4.76±0.03	5.38±0.1
CmoCh04G023590	CmIAA14	5.75±0.11	4.27±0.05	4.98±0	4.39±0.18
CmoCh04G028890	CmIAA15	5.1±0.14	5.35±0.03	4.52±0.04	4.33±0.1
CmoCh05G003790	CmIAA16	2.68±0.14	3.31±0.09	3.81±0.04	3.19±0.05
CmoCh05G005900	CmIAA17	4.18±0.17	4.93±0.12	6.74±0.06	5.45±0.11
CmoCh05G007670	CmIAA18	3.29±0.13	3.29±0.04	5.94±0.01	5.7±0.07
CmoCh05G012250	CmIAA19	6.72±0.31	2.53±0.26	5.94±0.05	3.12±0.31
CmoCh05G012260	CmIAA20	3.04±0.46	3.71±0.08	5.46±0.09	4.64±0.06
CmoCh05G014250	CmIAA21	3.5±0.16	3.52±0.04	5.43±0.03	4.22±0.23
CmoCh06G000030	CmIAA22	5.68±0.06	5.6±0.01	5.65±0.05	6±0.08
CmoCh06G009480	CmIAA23	1.7±0.2	3.93±0.09	4.97±0.04	5.45±0.09
CmoCh06G009490	CmIAA24	1.12±0.66	5.1±0.03	7.34±0.03	0.16±0.17
CmoCh06G013550	CmIAA25	6.87±0.19	3.25±0.19	7.46±0.05	6.08±0.01
CmoCh06G013570	CmIAA26	0.23±0.17	3.61±0.09	1.67±0.3	1.8±0.48
CmoCh07G000800	CmIAA27	4.92±0.13	5.69±0.02	4.7±0.07	5.32±0.08
CmoCh07G006010	CmIAA28	0.49±0.27	2.3±0.01	2.42±0.12	2.34±0.15
CmoCh08G001220	CmIAA29	1.01±0.27	2.36±0.12	2.15±0.12	3.1±0.01
CmoCh08G003010	CmIAA30	1.04±0.5	2.34±0.03	5.43±0.02	0.57±0.4
CmoCh08G003030	CmIAA31	2.28±0.98	4.21±0.07	7.43±0.06	0.5±0.28
CmoCh08G006140	CmIAA32	0.47±0.4	2.18±0.01	3.73±0.1	0.6±0.18
CmoCh08G010880	CmIAA33	0.2±0.05	3.74±0.17	3.74±0.11	0.1±0.09
CmoCh08G010900	CmIAA34	4±0.55	3.67±0.07	4.56±0.07	4.71±0.18
CmoCh09G001150	CmIAA35	0.12±0.02	0.23±0.01	1.84±0.08	1.73±0.06
CmoCh09G004620	CmIAA36	3.18±0.21	1.71±0.03	3.18±0.08	2.08±0.14
CmoCh09G006100	CmIAA37	1.33±0.37	1.21±0.05	3.55±0.09	5.64±0.06
CmoCh10G000150	CmIAA38	6.39±0.12	5.8±0.05	6.14±0.05	6±0.09
CmoCh10G005700	CmIAA39	0.62±0.38	1.3±0.02	2.31±0.15	2.78±0.4
CmoCh10G006330	CmIAA40	0.57±0.2	0.42±0.05	3.74±0.17	3.52±0.24
CmoCh10G006720	CmIAA41	4.74±0.17	4.2±0.01	6.58±0.04	6.94±0.04
CmoCh11G005280	CmIAA42	0.16±0.18	1.44±0.06	2.09±0.2	1.69±0.16
CmoCh11G005910	CmIAA43	2.03±0.38	0.2±0.11	1.93±0.08	1.41±0.21
CmoCh11G006340	CmIAA44	4.33±0.1	2.76±0.1	6.8±0.01	6.63±0.07
CmoCh11G009990	CmIAA45	6.41±0.22	4.75±0.07	5.67±0.03	6.1±0.04
CmoCh12G001340	CmIAA46	5.32±0.18	5.61±0.06	7.91±0.03	8.68±0.04
CmoCh12G008890	CmIAA47	0.14±0.24	1.89±0.04	1.38±0.15	0.34±0.18
CmoCh12G009300	CmIAA48	4.03±0.09	3.89±0.05	4.89±0.11	5.37±0.18
CmoCh12G011430	CmIAA49	1.97±0.09	3.19±0.21	5.67±0.09	6.45±0.12
CmoCh12G013660	CmIAA50	3.73±0.08	3.5±0.01	4.07±0.05	3.84±0.16
CmoCh13G005400	CmIAA51	3.19±0.06	4.51±0.08	4.54±0.02	3.57±0.04
CmoCh14G013230	CmIAA52	1.66±0.3	1.18±0.33	3.08±0.06	6.64±0.11
CmoCh14G013540	CmIAA53	0±0	0.19±0.28	0.76±0.37	0.27±0.24
CmoCh14G018090	CmIAA54	2.03±0.12	2.54±0.04	4.92±0.04	3.62±0.06
CmoCh14G018110	CmIAA55	3.57±0.11	4.36±0.07	7.51±0.06	6±0.08
CmoCh14G018910	CmIAA56	1.8±0.27	3.22±0.23	4.37±0.05	3.7±0.13
CmoCh15G008070	CmIAA57	5.59±0.04	3.4±0.05	4.74±0.05	4.48±0.13
CmoCh15G011500	CmIAA58	0.35±0.33	1.01±0.08	3.55±0.21	0.28±0.16
CmoCh15G013610	CmIAA59	2.77±0.09	2.82±0.07	4.37±0.06	5.26±0.02
CmoCh16G005850	CmIAA60	4.07±0.19	2.67±0.05	3.08±0.03	5.8±0.05
CmoCh17G001350	CmIAA61	0.98±0.19	1.52±0.25	3.27±0.09	2.88±0.08
CmoCh17G001860	CmIAA62	0.49±0.26	3.72±0.24	5.65±0.1	1.62±0.07
CmoCh17G001880	CmIAA63	6.58±0.22	4.49±0.04	5.97±0.07	5.43±0.14
CmoCh17G007560	CmIAA64	3.24±0.11	3.33±0.05	4.9±0.05	5.05±0.06
CmoCh17G007960	CmIAA65	0.32±0.25	1.8±0.08	3±0.19	1.77±0.26
CmoCh17G011930	CmIAA66	0.84±0.69	1.41±0.21	5.11±0.02	0.21±0.23
CmoCh17G011940	CmIAA67	1.19±0.76	4.04±0.21	7.08±0.05	0.2±0.08
CmoCh18G004680	CmIAA68	2.67±0.03	3.3±0.04	4.58±0.04	2.89±0.04
CmoCh18G010050	CmIAA69	0.09±0.16	0.08±0.12	0.32±0.07	0.32±0.29
CmoCh19G000550	CmIAA70	0.49±0.29	3.84±0.04	1.06±0.33	0.15±0.14
CmoCh19G001290	CmIAA71	5.11±0.07	3.43±0.08	4.56±0.03	4.2±0.03
CmoCh20G005090	CmIAA72	3.74±0.12	4.75±0	4.69±0.04	4.89±0.06
