# Supplementary material for: Genome-Wide Identification and Comprehensive Characterization of the Aux/IAA Gene Family in Cucurbita moschata and Its Response Analysis to Abiotic Stress
Source: Research Square preprint supplement (doi:10.21203/rs.3.rs-8529495/v1), 2026-01-28
Supplement: Supplementary file 5 [file a4ed182944d0001b582f889c.xlsx]

## Sheet: Sheet2
Additional file 2 Cis-acting element analysis of CmIAA gene promoters
	ACE	AT1-motif	ATCT-motif	Box 4	chs-CMA1a	GA-motif	GATA-motif	G-Box	GT1-motif	I-box	MRE	Sp1	TCCC-motif	TCT-motif	ABRE	AuxRR-core	CGTCA-motif	ERE	GARE-motif	P-box	TATC-box	TCA-element	TGA-element	TGACG-motif	AC-I	CAT-box	circadian	GCN4_motif	HD-Zip 1	O2-site	ARE	DRE	GC-motif	LTR	MBS	TC-rich repeats	W box	WUN-motif
CmIAA52			1	7				2							2		1	5						1				1				1						2
CmIAA1				1			3	6	4			3	1	3	4		3	1			1	1	1	3					1		1		1			1	1
CmIAA37				4	2		1	3		1			2	2	1	1	2	5		1		1	3	2						1	1					1	1	1
CmIAA4	1			2		1	2	3	1		1		1	1	3			2													4					1
CmIAA42				6				6	2	1		3			6	1	2	1		1		1		2	1	1				1	2	1	2	1	3		1	1
CmIAA39	1		1	8				16	1	1	1	1		1	15		2	2		1		1	1	2		1				2		1	2	2		1	1
CmIAA16		1		2			1	7		1	1	1		2	6		1	4				3		1		1	1	1			1	1		1			1	1
CmIAA36	1	1		6				4	1	2				2	5			3				1								1	1			1		2
CmIAA5				1				7	1				1	1	4	1	2					1	2	2			2			1	3				1		1
CmIAA47				2					1		2			1			2	3			1		1	2		1		1		1	3			2		1	2
CmIAA72				5				4	1	1					3			1		1		1	1						1		1		1					1
CmIAA7			5	2			2		2	1		3						3	2	1		6	1			1				1	3		1	1		1	1
CmIAA38				1			3	5	1			1	1	1	5		1	1		1	1			1					1	1	1				4
CmIAA15			1		1		3			1	1											1	1		1						3			2				1
CmIAA22				1				3		2					1		3				1			3		1	1						1	1	1	1	1	1
CmIAA13			1	7			2			1		1		1								2								1	2	2	1		2			2
CmIAA29				4			1	2	2			2	1		1			2			1														2		1
CmIAA60				5			1	7	4					1	6		2	2						2		1		1			2				1		3
CmIAA11		1		1				5						1	4		5	2		1		1	1	5		1					4				1		1	1
CmIAA59				6	1	1		5	2					1	4		6	4				1	1	6			1	2		1				1	2	1
CmIAA8			1	5				5	2						4		6	2				1	2	6				1			4			1			1
CmIAA57			1	1		1	1	6	2	1					5			3								1	1			1	1				2		1
CmIAA14			1	2		1		4	2		1		2	1	4			2				2	1				1				3				1	1	1	1
CmIAA27		1		3				4	3						3			2				1									2					1	1	1
CmIAA68				4				2	2				1	1	4		1	3		1	1	1		1								2					1	1
CmIAA51				2		1							1	2			1	1	1	1		1		1	1						3		1			1	1	3
CmIAA35				5		1		4	1				1	1	3		1	3				1		1						1							2	1
CmIAA6				1				7	1					2	6		1	1		3		1		1	1	1		1	1	1	2				1	1	2
CmIAA50				5		1		5	1		1	2		2	5		1	1		2			1	1		1				1	2		1	2	1	1	1	1
CmIAA21							1												1													1			1
CmIAA48				1			1		2					1					1							2					3			2	1	1	1
CmIAA18		1		1			1	1	3		2		1		1		1					1		1							3			1			2
CmIAA61				10				6			1				5		2	4				1		2						1	1	1		1
CmIAA56	1			4			1		2		1	1	1	1			2	1		2		1	1	2	1
CmIAA69						1		2		2					3		3	1		1		2		3						1	5			3	3
CmIAA12				1				2		1				2	1			2			1		2			1	1	2		1	3			1	1	1	1	1
CmIAA71				3				4	1		1		1		4		4	3		1				4				1						1			3
CmIAA9		1		3	1		2	2	2	3			2		2		1		1			1		1		1				1	3			1			1
CmIAA2				3			1	9	3		2			1	9		1							2	1					3	1						2
CmIAA53				2				2	1		1	1	2	1	2		2			2				2						1	2				1	2		1
CmIAA3				1			1	1		3					1	1												1		1	3	1				1	2
CmIAA65				5			2	1						1	2			4					1							1	2			2		1	2	1
CmIAA32				6				1			1			2	1			2	1	2	1	2				1										2	1	1
CmIAA66			1	3	1			13			2				14		2	1		2		1		2						1				1	1		3
CmIAA30	1						1	12	1						13		1	1				3		1			2			1	2				2		1
CmIAA58		2		7				9	3		2	1		2	6		1	4				1	1	1							1				1	2		2
CmIAA49				1				6					2	2	5		4	3		1		2		4							2							1
CmIAA19	1			1				3	1					2	3			2		3											1			3			1	1
CmIAA54	1		1				4	3	2	1	1			2	4		1	1				3		1							2			1		1	1
CmIAA26	1			3				4			3	1	3	1	5			1					2			1					5						2
CmIAA63	1			1			1	5	1	4			1		4		5	2		1				5						1	1						3
CmIAA34				3				4	2		2	1		2	2			4		1		1			1	1						2		1	1	1	2	1
CmIAA23				5			1	1	1		1			1			1	4				1	1	1			1	1							1	1	1	1
CmIAA43				3				4	1	3	1				5		2					1		2	1					2	3			2
CmIAA40				9		1		7	1	1			1	1	7		3	3				1	1	3		1				1	4			1	1			1
CmIAA64				2	1		1	2	2	1	2			1	2			6																	3
CmIAA44			1	4			1			5	1	1		1				3		1	1				2	1					1			1
CmIAA41				1	1			3	1					1	3				1	1		1			1						4				1	1
CmIAA28				6			1	6		1	1			1	5			2		1	1	2									2
CmIAA46			1	8				3			1		2		2			5		2		1				1					3	1		2		1
CmIAA17				3				3	1	1		1		2	2		1	3	1	1				1							2			1		1
CmIAA55	1			4				6	3						6		2	2				1		2					1		3				2	2
CmIAA25		1						6	4	1	4			2	3		2	1		1			1	2		1		1			1				1		2
CmIAA62	1			4			3	1	3			1	1		1		3	4		1				3			1			1	3				1		1
CmIAA33	1			6			1	7		2					7		3			1	1	1	1	4						2	2							2
CmIAA24			1	5	1		2	1	2	1			1		1		1	3			1			1						2	4					1		1
CmIAA45	1			3		1	1	4		2			1	1	2		1			1				1							3	1		3	1
CmIAA20				4			1	10	2	2			1		6		3	2				2	2	3				1		1				1	1		2	1
CmIAA67		1		4			1	3						3	2		2	1			3	2	2	2				1			3						4
CmIAA31			2		1			5		1			1		3	1	3	1		1		1	2	3						1	2				1			1
CmIAA70				1				2	1		2		1		2		2							2				2	1					2	1		1
CmIAA10				6		1			1					1			3	1		1			1	3		2			1		3				1	2	1
